# Supplementary material for: Predictors of Death in Patients with Neonatal Sepsis in a Peruvian Hospital
Source: MDPI journal article supplement (doi:10.3390/tropicalmed7110342), 2022-10-31
Supplement: s1 [file s1]

**Supplemental Table S1:** Cox 1 Regression for Predictors of Mortality in Early-Onset Sepsis

| Variable                   | cHR (95% CI)        | p-Value | aHR (95% CI)        | p-Value |
|----------------------------|---------------------|---------|---------------------|---------|
| Gestational age            |                     |         |                     |         |
| - Term newborn (>37)       | Ref                 |         | Ref                 |         |
| - Preterm newborn (<37)    | 33.47 (11.80-94.89) | <0.001  | 33.11 (2.66-411.85) | 0.007   |
| Leukocytes (cells/mm3)     |                     |         |                     |         |
| - Normal (<12000)          | Ref                 |         | Ref                 |         |
| - Leukocytosis (>12000)    | 0.41 (0.22-0.79)    | 0.007   | 1.69 (0.48-5.86)    | 0.412   |
| Platelets (cells x 103/L)  |                     |         |                     |         |
| - Normal (>150000)         | Ref                 |         | Ref                 |         |
| - Low count (<150000)      | 3.48 (1.86-6.52)    | <0.001  | 8.04 (1.68-38.55)   | 0.009   |
| Total Immature Index (IIT) |                     |         |                     |         |
| - Normal (<0.12)           | Ref                 |         | Ref                 |         |
| - High count (>0.12)       | 11.63 (2.75-49.07)  | 0.001   | -                   | -       |
| Glucose (mg/dL)            |                     |         |                     |         |
| - Normal (<150)            | Ref                 |         | Ref                 |         |
| - High count (>150)        | 4.75 (2.26-9.97)    | <0.001  | 0.39 (0.09-1.79)    | 0.227   |
| Creatinine (mg/dL)         |                     |         |                     |         |
| - Normal (<1.1)            | Ref                 |         | Ref                 |         |
| - High count (>1.1)        | 3.08 (1.42-6.66)    | 0.004   | 0.77 (0.22-2.79)    | 0.696   |
| pH                         |                     |         |                     |         |
| - Normal (>7.35)           | Ref                 |         | Ref                 |         |
| - Low count (<7.35)        | 2.76 (0.94-8.14)    | 0.066   | 2.44 (0.33-18.19)   | 0.384   |
| CO2 pressure (mmHg)        |                     |         |                     |         |
| - Normal (<45)             | Ref                 |         | Ref                 |         |
| - High count (>45)         | 2.14 (0.94-4.91)    | 0.071   | 0.76 (0.21-2.70)    | 0.668   |
| PaO2/FiO2*                 |                     |         |                     |         |
| - Normal >400              | Ref                 |         | Ref                 |         |
| - ARDS<400                 | 6.45 (0.86-48.26)   | 0.070   | 1.18 (0.10-13.51)   | 0.892   |

cHR: crude Hazard ratio, aHR: adjusted Hazard ratio, PaO2/FiO2: fraction between arterial oxygen pressure over the inspired fraction of oxygen, Ref: reference group.



**Supplemental Table S2:** Cox 2 Regression for Predictors of Mortality in Early-Onset Sepsis

| Variable                         | cHR (95% CI)       | p-Value | aHR (95% CI)      | p-Value |
|----------------------------------|--------------------|---------|-------------------|---------|
| Birth weight                     |                    |         |                   |         |
| - Normal (>2500 grams)           | Ref                |         | Ref               |         |
| - Low birth weight (<2500 grams) | 19.67 (8.18-47.32) | <0.001  | 3.63 (1.11-11.83) | 0.032   |
| APGAR score at 1 minute          |                    |         |                   |         |
| - Normal                         | Ref                |         | Ref               |         |
| - Moderate                       | 4.37 (2.09-9.13)   | <0.001  | 0.57 (0.25-1.35)  | 0.208   |
| - Low                            | 3.34 (1.44-7.69)   | <0.001  | 0.47 (0.16-1.41)  | 0.180   |
| APGAR score at 5 minutes         |                    |         |                   |         |
| - Normal                         | Ref                |         | Ref               |         |
| - Moderate                       | 3.40 (1.76-6.58)   | <0.001  | 2.77 (1.15-6.64)  | 0.023   |
| - Low                            | -                  | -       | -                 | -       |
| Septic Shock                     |                    |         |                   |         |
| - No                             | Ref                |         | Ref               |         |
| - Yes                            | 14.22 (7.51-26.91) | <0.001  | 2.72 (1.25-5.93)  | 0.012   |
| ARDS                             |                    |         |                   |         |
| - No                             | Ref                |         | Ref               |         |
| - Yes                            | 19.99 (7.75-51.53) | <0.001  | 2.83 (0.79-10.12) | 0.109   |
| Use of IMV                       |                    |         |                   |         |
| - No                             | Ref                |         | Ref               |         |
| - Yes                            | 21.52 (8.34-55.55) | <0.001  | 4.39 (1.35-14.23) | 0.014   |
| Use of CVC                       |                    |         |                   |         |
| - No                             | Ref                |         | Ref               |         |
| - Yes                            | 1.56 (0.21-11.56)  | 0.665   | 2.06 (0.20-21.00) | 0.541   |
| Use of exclusive breastfeeding   |                    |         |                   |         |
| - No                             | Ref                |         | Ref               |         |
| - Yes                            | 0.47 (0.25-0.90)   | 0.023   | 0.25 (0.12-0.54)  | <0.001  |

cHR: crude Hazard ratio, aHR: adjusted Hazard ratio, ARDS: acute respiratory distress syndrome, IMV: invasive mechanical ventilator, CVC: central venous catheter, Ref: reference group.
